# Supplementary material
Source: PubMed Central journal article supplement (PMC3370106)

*Supplemental Figure 1.*

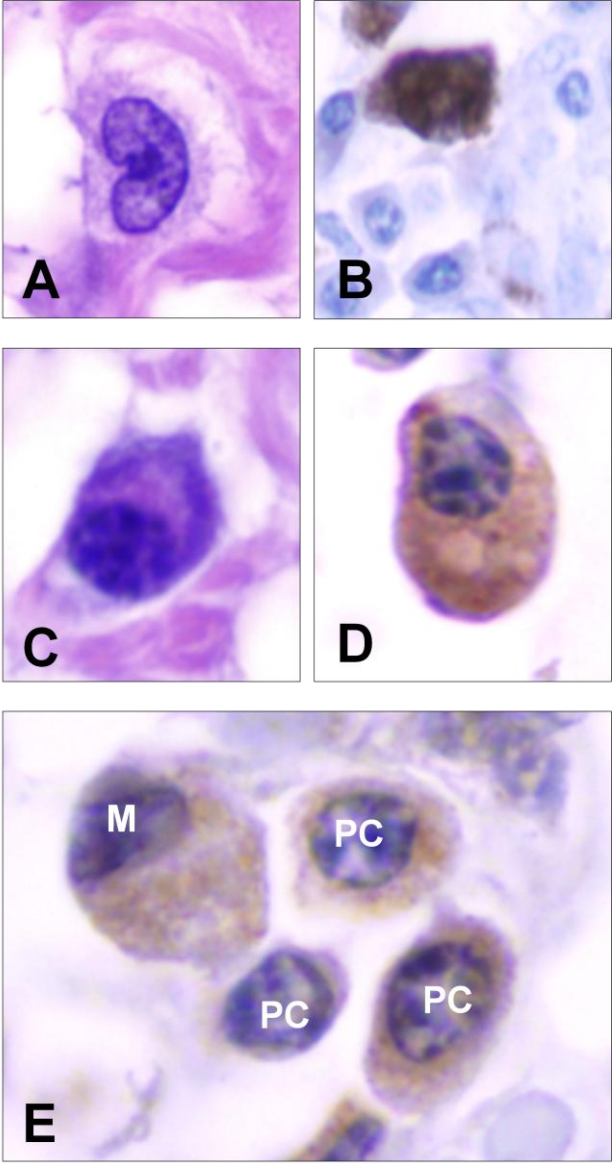

Supplement: NIHMS370349-supplement-2.pdf [file NIHMS370349-supplement-2.pdf]

Supplemental Figure 2.

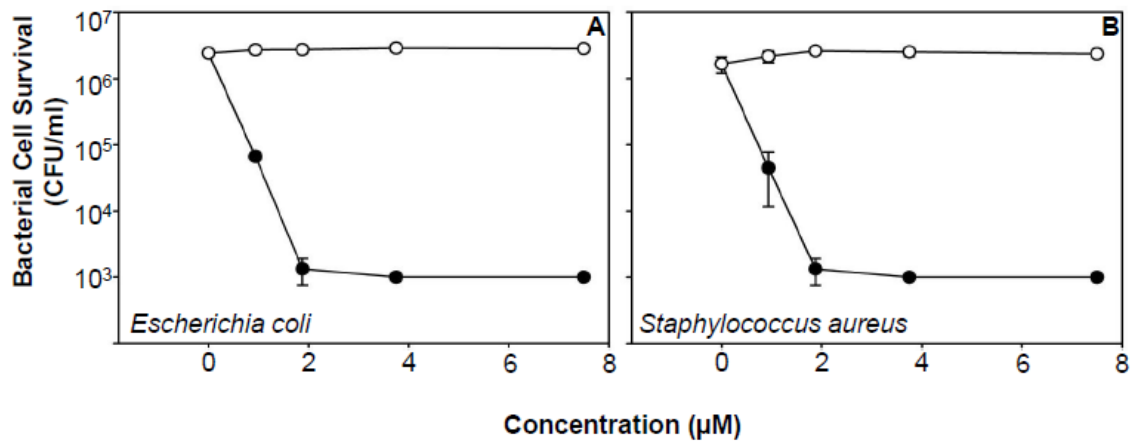

Supplement: NIHMS370349-supplement-3.pdf [file NIHMS370349-supplement-3.pdf]
